# Supplementary material for: Pharmacotypes across the genomic landscape of pediatric acute lymphoblastic leukemia and impact on treatment response
Source: PubMed Central journal article supplement (PMC9873558; doi:10.1038/s41591-022-02112-7), 2023-01-05
Supplement: 41591_2022_2112_MOESM1_ESM.pdf [file 41591_2022_2112_MOESM1_ESM.pdf]

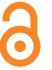

---

# Pharmacotypes across the genomic landscape of pediatric acute lymphoblastic leukemia and impact on treatment response

---

In the format provided by the authors and unedited

---

## Supplementary Information

# Supplementary Figure 1

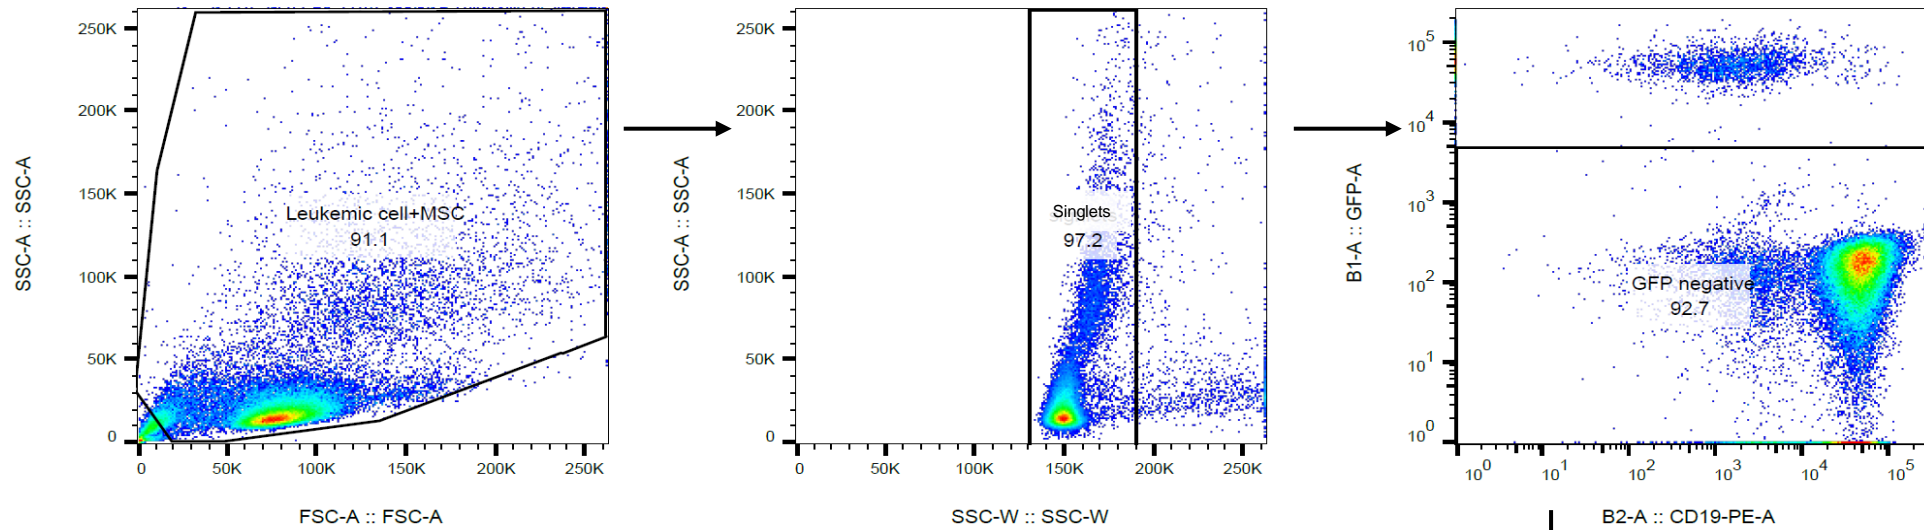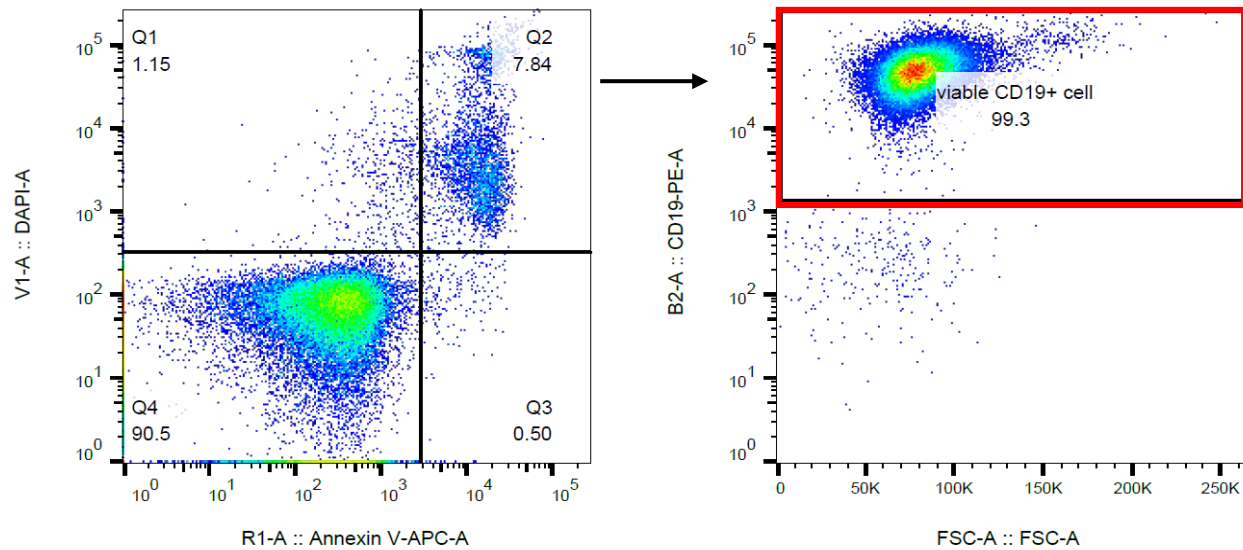

**Supp Figure 1. Gating strategy for MSC-flow assay.** A representative patient sample is shown. Flow data is analyzed on Flowjo. Debris was first excluded by SSC-A vs FSC-A, then singlets were gated by SSC-A vs SSC-W. Next, GFP negative cells were gated by GFP vs CD19-PE. Viable cells (annexin V and DAPI negative) were then gated by DAPI vs Annexin V-APC, and finally, viable leukemia cells (CD7 for T-ALL and CD19 for B-ALL) were further gated by CD19 or CD7 vs FSC-A.

## Supplementary Tables 3-9

**Supp Table 3. LC50 of each drug across clinical features**

| <u>Normalized median LC50</u> | <u>Age (years)#</u> |             |               | <u>Sex</u> |      |         | <u>WBC at diagnosis (x 10<sup>9</sup>/L)</u> |             |                 | <u>NCI risk group</u> |             |                 | <u>Population and ancestry</u> |         |                  |       |         |
|-------------------------------|---------------------|-------------|---------------|------------|------|---------|----------------------------------------------|-------------|-----------------|-----------------------|-------------|-----------------|--------------------------------|---------|------------------|-------|---------|
|                               | 1 to <10            | ≥10         | P value       | F          | M    | P value | <50                                          | ≥50         | P value         | SR                    | HR          | P value         | European                       | African | Admixed American | Other | P value |
| prednisolone                  | <b>0.18</b>         | <b>0.26</b> | <b>0.003*</b> | 0.17       | 0.21 | 0.013   | 0.18                                         | 0.19        | 0.880           | 0.18                  | 0.20        | 0.055           | 0.19                           | 0.17    | 0.17             | 0.19  | 0.223   |
| dexamethasone                 | 0.55                | 0.61        | 0.038         | 0.54       | 0.60 | 0.056   | 0.58                                         | 0.55        | 0.630           | 0.56                  | 0.59        | 0.246           | 0.60                           | 0.52    | 0.49             | 0.68  | 0.055   |
| vincristine                   | 0.23                | 0.16        | 0.066         | 0.20       | 0.24 | 0.512   | 0.21                                         | 0.24        | 0.416           | 0.23                  | 0.20        | 0.579           | 0.22                           | 0.25    | 0.08             | 0.14  | 0.031   |
| daunorubicin                  | 0.49                | 0.54        | 0.238         | 0.5        | 0.50 | 0.814   | 0.51                                         | 0.49        | 0.901           | 0.50                  | 0.50        | 0.482           | 0.50                           | 0.45    | 0.53             | 0.50  | 0.612   |
| asparaginase                  | <b>0.40</b>         | <b>0.62</b> | <b>0.001*</b> | 0.42       | 0.51 | 0.174   | 0.45                                         | 0.52        | 0.126           | <b>0.37</b>           | <b>0.56</b> | <b>2.6E-04*</b> | 0.47                           | 0.47    | 0.50             | 0.39  | 0.773   |
| mercaptopurine                | 0.48                | 0.49        | 0.840         | 0.48       | 0.49 | 0.651   | <b>0.5</b>                                   | <b>0.42</b> | <b>0.004*</b>   | 0.50                  | 0.45        | 0.091           | 0.50                           | 0.45    | 0.45             | 0.40  | 0.383   |
| thioguanine                   | 0.26                | 0.25        | 0.896         | 0.24       | 0.27 | 0.224   | 0.27                                         | 0.22        | 0.092           | 0.27                  | 0.23        | 0.083           | 0.29                           | 0.17    | 0.19             | 0.21  | 0.006   |
| cytarabine                    | 0.52                | 0.59        | 0.048         | 0.5        | 0.54 | 0.513   | 0.54                                         | 0.48        | 0.076           | 0.53                  | 0.52        | 0.271           | 0.54                           | 0.49    | 0.53             | 0.47  | 0.293   |
| nelarabine                    | 1.0                 | 0.98        | 0.383         | 1.0        | 1.0  | 0.954   | 1.0                                          | 0.98        | 0.120           | 1.0                   | 0.98        | 0.052           | 1.0                            | 1.0     | 1.0              | 0.87  | 0.084   |
| vorinostat                    | 0.58                | 0.58        | 0.983         | 0.57       | 0.59 | 0.260   | 0.59                                         | 0.57        | 0.865           | 0.59                  | 0.57        | 0.774           | 0.58                           | 0.60    | 0.55             | 0.56  | 0.546   |
| panobinostat                  | 0.23                | 0.28        | 0.511         | 0.24       | 0.23 | 0.440   | 0.24                                         | 0.21        | 0.062           | 0.24                  | 0.21        | 0.596           | 0.24                           | 0.28    | 0.21             | 0.2   | 0.285   |
| bortezomib                    | 0.38                | 0.41        | 0.800         | 0.38       | 0.40 | 0.658   | 0.39                                         | 0.43        | 0.151           | 0.38                  | 0.41        | 0.625           | 0.38                           | 0.36    | 0.42             | 0.38  | 0.680   |
| CHZ868                        | 0.6                 | 0.55        | 0.738         | 0.61       | 0.56 | 0.749   | 0.67                                         | 0.51        | 0.626           | 0.67                  | 0.55        | 0.945           | 0.77                           | 0.41    | 0.51             | 0.49  | 0.332   |
| ruxolitinib                   | 1.0                 | 1.0         | 0.888         | 1.0        | 1.0  | 0.591   | 1.0                                          | 1.0         | 0.935           | 1.0                   | 1.0         | 0.481           | 1.0                            | 1.0     | 1.0              | 1.0   | 0.935   |
| dasatinib                     | 0.96                | 0.98        | 0.865         | 1.0        | 0.95 | 0.380   | <b>1.0</b>                                   | <b>0.86</b> | <b>3.2E-04*</b> | 0.99                  | 0.95        | 0.107           | 1.0                            | 0.88    | 0.92             | 0.92  | 0.191   |
| ibrutinib                     | 0.52                | 0.50        | 0.664         | 0.53       | 0.50 | 0.635   | 0.51                                         | 0.53        | 0.997           | 0.51                  | 0.53        | 0.280           | 0.54                           | 0.51    | 0.42             | 0.45  | 0.779   |
| trametinib                    | 0.79                | 0.75        | 0.935         | 0.79       | 0.75 | 0.512   | 0.78                                         | 0.78        | 0.657           | 0.76                  | 0.82        | 0.270           | 0.78                           | 0.98    | 0.65             | 0.69  | 0.411   |
| venetoclax                    | 0.53                | 0.46        | 0.847         | 0.52       | 0.51 | 0.753   | 0.47                                         | 0.57        | 0.017           | 0.46                  | 0.57        | 0.011           | 0.53                           | 0.56    | 0.45             | 0.45  | 0.776   |

#7 patients aged less than 1 year of age not included due to small numbers of measurements

Nominal P values determined by 2-sided Mann-Whitney test or Kruskal-Wallis test are shown. Those with P<0.05 after adjustment by Benjamini-Hochberg procedure are marked in bold and by an asterix (\*) and are as follows: prednisolone and age, p-adjust=0.027; asparaginase and age, p-adjust=0.018; mercaptopurine and WBC, p-adjust=0.036; dasatinib and WBC, p-adjust=0.006; asparaginase and NCI, risk, p-adjust=0.005.

Abbreviations: WBC, white blood cell count; NCI, National Cancer Institute; SR, standard risk; HR, high risk

**Supp Table 4. Number of tested samples in each drug-subtype combination**

| Drug           | <i>ETV6-RUNX1</i> | <i>ETV6-RUNX1</i> -like | Hyperdiploid | <i>DUX4</i> | <i>PAX5</i> alt | <i>TCF3-PBX1</i> | <i>ZNF384</i> | T-ALL | ETP | <i>BCR-ABL1</i> | <i>BCR-ABL1</i> -like | <i>CRLF2</i> | <i>KMT2A</i> | iAMP21 | <i>MEF2D</i> | Near haploid | B-other |
|----------------|-------------------|-------------------------|--------------|-------------|-----------------|------------------|---------------|-------|-----|-----------------|-----------------------|--------------|--------------|--------|--------------|--------------|---------|
| asparaginase   | 151               | 11                      | 132          | 29          | 25              | 26               | 6             | 89    | 14  | 17              | 12                    | 14           | 27           | 6      | 6            | 5            | 40      |
| bortezomib     | 48                | 2                       | 42           | 11          | 8               | 5                | 1             | 21    | 4   | 5               | 4                     | 5            | 6            | 4      | 1            | 1            | 12      |
| CHZ868         | 27                | 1                       | 19           | 5           | 2               | 2                | 1             | 8     |     | 5               | 2                     | 4            | 5            | 2      | 1            | 1            | 13      |
| cytarabine     | 90                | 9                       | 76           | 18          | 15              | 15               | 5             | 57    | 6   | 9               | 4                     | 7            | 20           | 2      | 3            | 2            | 28      |
| dasatinib      | 42                | 2                       | 37           | 12          | 8               | 3                | 1             | 23    | 3   | 6               | 3                     | 9            | 6            | 3      | 2            | 1            | 14      |
| daunorubicin   | 46                | 2                       | 39           | 9           | 7               | 5                | 1             | 72    | 11  | 5               | 4                     | 5            | 6            | 4      | 1            | 1            | 12      |
| dexamethasone  | 118               | 10                      | 105          | 22          | 24              | 23               | 5             | 54    | 6   | 11              | 6                     | 11           | 21           | 4      | 5            | 6            | 36      |
| ibrutinib      | 40                | 2                       | 36           | 11          | 7               | 3                | 1             | 20    | 2   | 6               | 2                     | 9            | 5            | 3      | 1            | 1            | 14      |
| mercaptopurine | 170               | 13                      | 146          | 28          | 28              | 25               | 4             | 79    | 12  | 17              | 12                    | 13           | 22           | 8      | 6            | 8            | 47      |
| nelarabine     | 34                |                         | 22           | 6           | 4               | 3                |               | 11    | 4   | 3               | 3                     | 2            | 3            | 2      | 1            |              | 8       |
| panobinostat   | 16                | 1                       | 20           | 6           | 5               | 2                |               | 15    |     | 2               | 1                     | 2            | 4            | 2      | 1            | 1            | 2       |
| prednisolone   | 156               | 11                      | 136          | 29          | 28              | 25               | 6             | 82    | 15  | 15              | 9                     | 14           | 24           | 7      | 8            | 7            | 43      |
| ruxolitinib    | 28                | 2                       | 32           | 8           | 7               | 1                | 1             | 13    | 1   | 4               | 2                     | 5            | 4            | 3      | 2            | 1            | 7       |
| thioguanine    | 123               | 11                      | 110          | 21          | 23              | 20               | 6             | 58    | 8   | 13              | 7                     | 10           | 18           | 5      | 5            | 6            | 36      |
| trametinib     | 40                | 2                       | 37           | 10          | 7               | 3                | 1             | 18    | 2   | 6               | 2                     | 8            | 5            | 3      | 1            | 1            | 14      |
| venetoclax     | 37                | 1                       | 30           | 8           | 4               | 2                | 1             | 16    | 2   | 6               | 2                     | 7            | 5            | 3      | 1            | 1            | 14      |
| vincristine    | 157               | 10                      | 130          | 25          | 24              | 23               | 5             | 91    | 14  | 15              | 7                     | 14           | 23           | 7      | 6            | 5            | 42      |
| vorinostat     | 40                |                         | 25           | 8           | 4               | 3                | 1             | 13    | 4   | 5               | 3                     | 5            | 5            | 3      | 1            | 1            | 10      |

**Supp Table 5. Nominal and adjusted P-values for comparisons of drug sensitivity between leukemia subtypes**

| Drug                                                         | Comparisons                                   | 2-sided nominal P value | P value after Benjamini-Hochberg correction (p-adjust) |
|--------------------------------------------------------------|-----------------------------------------------|-------------------------|--------------------------------------------------------|
| Prednisolone, vincristine, daunorubicin, asparaginase (PVDL) | <i>ETV6-RUNX1</i> vs. remainder               | 1.90E-18                | 3.70E-17                                               |
|                                                              | Hyperdiploid vs. remainder                    | 0.004                   | 0.012                                                  |
|                                                              | <i>BCR-ABL1</i> vs <i>ETV6-RUNX1</i>          | 0.001                   | 0.010                                                  |
|                                                              | <i>BCR-ABL1</i> -like vs <i>ETV6-RUNX1</i>    | 5.27E-07                | 5.90E-05                                               |
|                                                              | <i>KMT2A</i> vs <i>ETV6-RUNX1</i>             | 7.76E-09                | 9.60E-07                                               |
|                                                              | <i>DUX4</i> vs <i>ETV6-RUNX1</i>              | 0.0006                  | 0.008                                                  |
| asparaginase                                                 | <i>DUX4</i> vs <i>ETV6-RUNX1</i>              | 1.60E-11                | 1.10E-08                                               |
|                                                              | <i>ETV6-RUNX1</i> vs. <i>ETV6-RUNX1</i> -like | 0.013                   | 0.110                                                  |
| cytarabine                                                   | <i>NUTM1</i> vs. remainder                    | 0.007                   | 0.047                                                  |
|                                                              | T-ALL vs ETP-ALL                              | 0.020                   | 0.147                                                  |
| dasatinib                                                    | T-ALL vs remainder                            | 1.75E-07                | 2.60E-06                                               |
|                                                              | <i>TCF3-PBX1</i> vs remainder                 | 0.013                   | 0.049                                                  |
|                                                              | <i>BCR-ABL1</i> vs remainder                  | 3.05E-07                | 2.18E-06                                               |
| daunorubicin                                                 | T-ALL vs ETP-ALL                              | 0.001                   | 0.128                                                  |
| ibrutinib                                                    | <i>BCR-ABL1</i> vs remainder                  | 0.002                   | 0.034                                                  |
| mercaptopurine                                               | <i>NUTM1</i> vs. remainder                    | 0.002                   | 0.010                                                  |
|                                                              | T-ALL vs ETP-ALL                              | 0.017                   | 0.080                                                  |
| prednisolone                                                 | T-ALL vs ETP-ALL                              | 0.009                   | 0.045                                                  |
| thioguanine                                                  | <i>NUTM1</i> vs. remainder                    | 0.0003                  | 0.003                                                  |
|                                                              | T-ALL vs ETP-ALL                              | 0.006                   | 0.043                                                  |
| trametinib                                                   | <i>ETV6-RUNX1</i> vs. <i>ETV6-RUNX1</i> -like | 0.002                   | 0.283                                                  |
| venetoclax                                                   | Hyperdiploid vs. remainder                    | 4.08E-05                | 5.33E-04                                               |
| vincristine                                                  | T-ALL vs ETP-ALL                              | 0.0005                  | 0.006                                                  |

For subtype A vs subtype B comparisons, correction for multiple testing performed for number of pairwise comparisons made (up to N=253).

For subtype A vs the remainder comparisons, correction for multiple testing performed for number of subtypes compared (up to N=23).



**Supp Table 6. Comparison of included vs. non-included patients from TXV/TXVI cohorts**

| Clinical characteristics               |                       | Not Included (N=462) |       | Included (N=634) |       | P value* |
|----------------------------------------|-----------------------|----------------------|-------|------------------|-------|----------|
|                                        |                       | N                    | %     | N                | %     |          |
| Subtype                                | T-ALL                 | 72                   | 15.6% | 108              | 17.0% | 0.522    |
|                                        | B-ALL                 | 390                  | 84.4% | 526              | 83.0% |          |
| Treated risk group                     | LR                    | 221                  | 48.9% | 274              | 44.0% | 0.11     |
|                                        | SR/HR                 | 231                  | 51.1% | 349              | 56.0% |          |
| Age group (years)                      | <1                    | 5                    | 1.1%  | 7                | 1.1%  | 0.123    |
|                                        | 1 to <10              | 320                  | 74.8% | 474              | 69.3% |          |
|                                        | ≥10                   | 137                  | 24.1% | 153              | 29.7% |          |
| WBC at diagnosis (x10 <sup>9</sup> /L) | <50                   | 375                  | 71.9% | 456              | 81.2% | 0.0004   |
|                                        | ≥50                   | 87                   | 28.1% | 178              | 18.8% |          |
| D42 MRD                                | MRD negative (<0.01%) | 370                  | 83.7% | 521              | 83.5% | 0.925    |
|                                        | MRD positive (≥0.01%) | 72                   | 16.3% | 103              | 16.5% |          |

\*Nominal P values as shown and determined by 2-sided Chi-square test  
Abbreviations: WBC, white blood cell count; SR, standard risk; HR, high risk

**Supp Table 7. Multivariable analysis of drug sensitivity clusters with event-free-survival in whole cohort**

| Prognostic factor                      |                         | HR   | 95% CI     | P value* |
|----------------------------------------|-------------------------|------|------------|----------|
| Drug sensitivity cluster               | Cluster I               | 5.31 | 1.35-20.84 | 0.025    |
|                                        | Cluster II              | 2.57 | 0.8-8.2    |          |
|                                        | Cluster III (ref)       | 1.0  | -          |          |
|                                        | Cluster IV              | 0.79 | 0.34-1.84  |          |
|                                        | Cluster V               | 1.11 | 0.3-4.09   |          |
|                                        | Cluster VI              | 1.98 | 0.97-4.07  |          |
| Minimal residual disease               | Negative (<0.01%) (ref) | 1.0  | -          | 0.015    |
|                                        | Positive (≥0.01%)       | 1.99 | 1.14-3.47  |          |
| WBC at diagnosis (x10 <sup>9</sup> /L) | <50 (ref)               | 1.0  | -          | 0.029    |
|                                        | ≥50                     | 1.88 | 1.07-3.28  |          |
| Age at diagnosis (years)               | <1                      | 2.40 | 0.55-10.47 | 0.477    |
|                                        | 1 to 10 (ref)           | 1.0  | -          |          |
|                                        | ≥10                     | 1.23 | 0.71-2.13  |          |
| B vs T subtype                         | B-ALL (ref)             | 1.0  | -          | 0.227    |
|                                        | T-ALL                   | 0.66 | 0.33-1.31  |          |

\*P values determined by 2-sided Cox proportional hazard's regression test. P values are adjusted for treatment arm i.e. TXV low risk, TXV standard/high risk, TXVI low risk, TXVI standard/high risk

**Supp Table 8. Multivariable analysis of dasatinib sensitivity with event-free survival in T-ALL**

|                                        | Prognostic factor       | HR   | 95% CI     | P value |
|----------------------------------------|-------------------------|------|------------|---------|
| Dasatinib sensitivity                  | LC50 <0.25              | 3.23 | 1.03-10.14 | 0.044   |
|                                        | LC50 ≥0.25 (ref)        | 1.0  | -          |         |
| Minimal residual disease               | Negative (<0.01%) (ref) | 1.0  | -          | 0.398   |
|                                        | Positive (≥0.01%)       | 1.65 | 0.52-5.27  |         |
| Age at diagnosis (years)               | 1 to 10 (ref)           | 1.0  | -          | 0.905   |
|                                        | ≥10                     | 1.06 | 0.38-2.90  |         |
| WBC at diagnosis (x10 <sup>9</sup> /L) | <50 (ref)               | 1.0  | -          | 0.511   |
|                                        | ≥50                     | 1.51 | 0.44-5.15  |         |

\*P values determined by 2-sided Cox proportional hazard's regression test. P values are adjusted for treatment arm i.e. TXV standard/high risk, TXVI standard/high risk

**Supp Table 9. Tested concentrations for 18 drugs in ex vivo pharmacotyping assays**

| Levels | <u>Drug concentrations (units)</u> |                    |                |                          |                   |                            |                             |                         |                              |                          |                      |                            |                     |                           |                    |                    |                           |                    |
|--------|------------------------------------|--------------------|----------------|--------------------------|-------------------|----------------------------|-----------------------------|-------------------------|------------------------------|--------------------------|----------------------|----------------------------|---------------------|---------------------------|--------------------|--------------------|---------------------------|--------------------|
|        | Asparaginase<br>(IU/ml)            | Bortezomib<br>(nM) | CHZ868<br>(nM) | Cytarabine<br>( $\mu$ M) | Dasatinib<br>(nM) | Daunorubicin<br>( $\mu$ M) | Dexamethasone<br>( $\mu$ M) | Ibrutinib<br>( $\mu$ M) | Mercaptopurine<br>( $\mu$ M) | Nelarabine<br>( $\mu$ M) | Panobinostat<br>(nM) | Prednisolone<br>( $\mu$ M) | Ruxolitinib<br>(nM) | Thioguanine<br>( $\mu$ M) | Trametinib<br>(nM) | Venetoclax<br>(nM) | Vincristine<br>( $\mu$ M) | Vorinostat<br>(nM) |
| 1      | 0.0032                             | 0.98               | 0.1            | 0.04                     | 0.1               | 0.004                      | 0.00035                     | 1.5625                  | 91.8                         | 1.03                     | 0.98                 | 0.015                      | 0.1                 | 9.35                      | 0.01               | 0.001              | 0.0017                    | 102.88             |
| 2      | 0.016                              | 3.9                | 1              | 0.16                     | 1                 | 0.014                      | 0.0028                      | 3.125                   | 183.6                        | 3.09                     | 3.9                  | 0.125                      | 1                   | 18.69                     | 0.1                | 0.01               | 0.0132                    | 308.64             |
| 3      | 0.08                               | 15.6               | 10             | 0.64                     | 10                | 0.055                      | 0.023                       | 6.25                    | 367.25                       | 9.26                     | 15.9                 | 0.98                       | 10                  | 37.38                     | 1                  | 0.1                | 0.1058                    | 925.93             |
| 4      | 0.4                                | 62.5               | 100            | 2.56                     | 100               | 0.22                       | 0.181                       | 12.5                    | 734.5                        | 27.8                     | 62.5                 | 7.87                       | 100                 | 74.75                     | 10                 | 1                  | 0.8464                    | 2777.78            |
| 5      | 2                                  | 250                | 1000           | 10.27                    | 1000              | 0.89                       | 1.45                        | 25                      | 1469                         | 83.3                     | 250                  | 62.9                       | 1000                | 149.5                     | 100                | 10                 | 6.7711                    | 8333.33            |
| 6      | 10                                 | 1000               | 10000          | 41.1                     | 10000             | 3.55                       | 11.6                        | 50                      | 2938                         | 250                      | 1000                 | 503.5                      | 10000               | 299                       | 1000               | 100                | 54.169                    | 25000              |
